# Supplementary material
Source: PubMed Central journal article supplement (PMC3535330)
Supplement: NIHMS378508-supplement-1_si_001.pdf [file NIHMS378508-supplement-1_si_001.pdf]

# Glucocorticoid Receptor-Promoter Interactions: Energetic Dissection Suggests a Framework for Specificity of Steroid Receptor-Mediated Gene Regulation

James P. Robblee, Michael T. Miura, and David L. Bain

Department of Pharmaceutical Sciences  
University of Colorado Anschutz Medical Campus

## Supplementary Information for Figure 6: Simulations of non-competitive and competitive GR and PR-B promoter binding

**Figure 6A** presents non-competitive simulations of GR and PR-B binding to the GRE<sub>2</sub> promoter, calculating the probability ( $P$ ) of the fully-ligated promoter:

$$P_{\text{GR}} = \frac{K_{\text{tot-GR}}^2 k_{\text{c,inter-GR}} x_{\text{m-GR}}^4}{1 + 2K_{\text{tot-GR}} x_{\text{m-GR}}^2 + K_{\text{tot-GR}}^2 k_{\text{c,inter-GR}} x_{\text{m-GR}}^4} \quad (1)$$

$$P_{\text{PR-B}} = \frac{K_{\text{tot-PR-B}}^2 k_{\text{c,inter-PR-B}} x_{\text{m-PR-B}}^4}{1 + 2K_{\text{tot-PR-B}} x_{\text{m-PR-B}}^2 + K_{\text{tot-PR-B}}^2 k_{\text{c,inter-PR-B}} x_{\text{m-PR-B}}^4} \quad (2)$$

where  $x_{\text{m}}$  is the free receptor monomer concentration,  $K_{\text{tot}}$  is the total binding affinity for saturating a single response element with two receptor monomers, and  $k_{\text{c,inter}}$  is the inter-site cooperativity between receptors bound to adjacent palindromic response elements. Note that because these are simulations of non-competitive receptor-promoter binding, the denominator of each equation ( $Q$  or the partition function) only describes binding interactions for a single receptor (GR or PR-B).

**Figure 6B** presents competitive simulations of GR and PR-B pre-formed dimer binding to the GRE<sub>2</sub> promoter using the following equations:

$$P_{GR} = \frac{k_{c,inter-GR} k_{int,d-GR}^2 x_{di-GR}^2}{Q} \quad (3)$$

$$P_{PR-B} = \frac{k_{c,inter-PR-B} k_{int,d-PR-B}^2 x_{di-PR-B}^2}{Q} \quad (4)$$

where  $Q$  is now defined as:

$$Q = 1 + 2k_{int,d-GR} x_{di-GR} + 2k_{int,d-PR-B} x_{di-PR-B} + k_{c,inter-GR} k_{int,d-GR}^2 x_{di-GR}^2 + k_{c,inter-PR-B} k_{int,d-PR-B}^2 x_{di-PR-B}^2 \quad (5)$$

and  $x_{di}$  is the concentration of receptor dimer,  $k_{c,inter}$  is the inter-site cooperativity between receptors bound to adjacent palindromic response elements, and  $k_{int,d}$  is the intrinsic affinity of a pre-formed receptor dimer for DNA. Note that the denominator ( $Q$ ) has been expanded to include all possible binding interactions for both GR and PR-B.

**Figure 6C** presents a competitive simulation of GR and PR-B monomer binding to the GRE<sub>2</sub> promoter using the following probability of saturation ( $P$ ) equations:

$$P_{GR} = \frac{k_{c,inter-GR} k_{c,intra-GR}^2 k_{int,m-GR}^4 x_{m-GR}^4}{Q} \quad (6)$$

$$P_{\text{PR-B}} = \frac{k_{\text{c,inter-PR-B}} k_{\text{c,intra-PR-B}}^2 k_{\text{int,m-PR-B}}^4 x_{\text{m-PR-B}}^4}{Q} \quad (7)$$

Q is defined as:

$$\begin{aligned} Q = & 1 + 4k_{\text{int,m-GR}} x_{\text{m-GR}} + 4k_{\text{int,m-PR-B}} x_{\text{m-PR-B}} + 4k_{\text{int,m-GR}}^2 x_{\text{m-GR}}^2 \\ & + 4k_{\text{int,m-PR-B}}^2 x_{\text{m-PR-B}}^2 + 2k_{\text{c,intra-GR}} k_{\text{int,m-GR}}^2 x_{\text{m-GR}}^2 \\ & + 2k_{\text{c,intra-PR-B}} k_{\text{int,m-PR-B}}^2 x_{\text{m-PR-B}}^2 + 4k_{\text{c,intra-GR}} k_{\text{int,m-GR}}^3 x_{\text{m-GR}}^3 \\ & + 4k_{\text{c,intra-PR-B}} k_{\text{int,m-PR-B}}^3 x_{\text{m-PR-B}}^3 + k_{\text{c,inter-GR}} k_{\text{c,intra-GR}}^2 k_{\text{int,m-GR}}^4 x_{\text{m-GR}}^4 \\ & + k_{\text{c,inter-PR-B}} k_{\text{c,intra-PR-B}}^2 k_{\text{int,m-PR-B}}^4 x_{\text{m-PR-B}}^4 \end{aligned} \quad (8)$$

where  $x_{\text{m}}$  is the free receptor monomer concentration,  $k_{\text{c,inter}}$  is the inter-site cooperativity between receptors bound to adjacent palindromic response elements,  $k_{\text{c,intra}}$  is the intra-site cooperativity between two monomers bound to the same response element, and  $k_{\text{int,m}}$  is the intrinsic affinity of a monomeric receptor for DNA.

**Figure 6D** presents a competitive simulation of GR and PR-B monomer binding to a promoter consisting of a single palindromic response element and a half-site. We assume that receptor monomers can cooperatively interact with receptor dimers bound at another palindromic site with a cooperative term equivalent to that of adjacently bound dimers ( $k_{\text{c,inter}}$ ). The following equations were used:

$$P_{\text{GR}} = \frac{k_{\text{c,inter-GR}} k_{\text{c,intra-GR}} k_{\text{int,m-GR}}^3 x_{\text{m-GR}}^3}{Q} \quad (9)$$

$$P_{\text{PR-B}} = \frac{k_{\text{c,inter-PR-B}} k_{\text{c,intra-PR-B}} k_{\text{int,m-PR-B}}^3 x_{\text{m-PR-B}}^3}{Q} \quad (10)$$

Q is now defined as:

$$\begin{aligned}
Q = & 1 + 3k_{\text{int,m-GR}}x_{\text{m-GR}} + 3k_{\text{int,m-PR-B}}x_{\text{m-PR-B}} + 2k_{\text{int,m-GR}}^2x_{\text{m-GR}}^2 \\
& + 2k_{\text{int,m-PR-B}}^2x_{\text{m-PR-B}}^2 + k_{\text{c,intra-GR}}k_{\text{int,m-GR}}^2x_{\text{m-GR}}^2 \\
& + k_{\text{c,intra-PR-B}}k_{\text{int,m-PR-B}}^2x_{\text{m-PR-B}}^2 + k_{\text{c,inter-GR}}k_{\text{c,intra-GR}}k_{\text{int,m-GR}}^3x_{\text{m-GR}}^3 \\
& + k_{\text{c,inter-PR-B}}k_{\text{c,intra-PR-B}}k_{\text{int,m-PR-B}}^3x_{\text{m-PR-B}}^3
\end{aligned} \tag{11}$$

where  $x_m$  is the free receptor monomer concentration,  $k_{\text{c,inter}}$  is the inter-site cooperativity between receptors bound to adjacent palindromic response elements,  $k_{\text{c,intra}}$  is the intra-site cooperativity between two monomers bound to the same response element, and  $k_{\text{int,m}}$  is the intrinsic affinity of a monomeric receptor for DNA.
